# Supplementary material
Source: publisher site journal article supplement (https://www.dovepress.com/article/255170)

Supplementary Figure 1

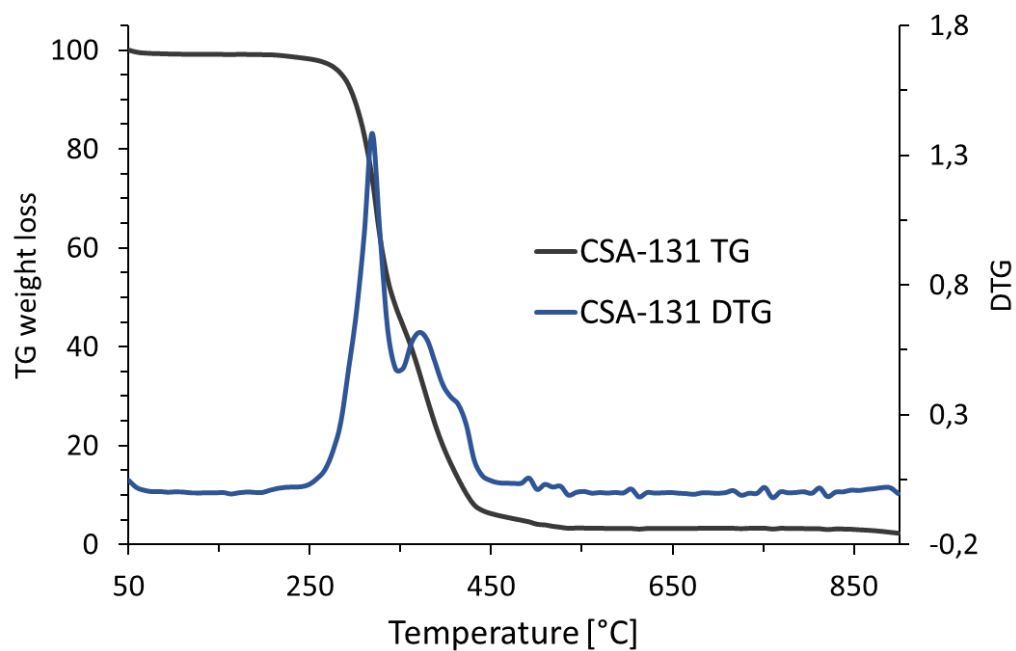

**Supplementary Figure 1.** TD and DTG of ceragenin CSA-131

Supplement: Supplementary file 1 [file get_supplementary_file.php]
